# Supplementary material
Source: PubMed Central journal article supplement (PMC1450215)
Supplement: pnas_0505379103_1.pdf [file pnas_0505379103_1.pdf]

```

<-----framework 1-----> <--CDR1--> <-framework2-> <-----CDR2-----> <-----framework 3----->
DVQLQASGGGSVQAGGSLRLSCAAS GYTIGPYCMG WFRQAPGKEREVA AINMGGGITYYADSVKG RFTISQDNAKNTVYLLMNSLEPEDTAIYYCAA
EVQLQASGGGSVQAGQSLRLSCATS GATSSSNMCMG WFRQAPGKEREVA VIDTGRGNTAYADSVQG RLTISLDNAKNTLYLQMNSLKPEDTAMYYCAA
QVQLVESGGGSVQAGGSLRLSCAVS GYKDRNYCMG WFRRAPGKEREVA VIDS SGR TAYADSVKG RFTISRDVALDTAYLQMNSLKPEDTAMYYCAA
DVQLVESGGGSVQAGESLRLSCAAS GVTYKNYCI WFRQAPGKDREGVV FINS DGGITYYADSVKG RFTISQDNAKNTVYLLQMNSLKPEDTASYCAA
DVQLVESGGGSVQAGGSLRLSCAAS GSTDSIEYMT WFRQAPGKAREGVA ALYTH TGN TTYTDSVKG RFTISQDKAKNMAYLRMDSVKS EDTAIYTCGA
QVQLVESGGGSAQAGGSLRLSCVAS GYTGDS MA WFRQAAGKEREVA AIYIDSGSDIAESLRG RFTISKDKARNTIYLQMNSLKLED TGIYYCAA
DVQLVESGGGSVQAGGSLRLSCAAS GYIASINYL WFRQAPGKEREVA AVSPAGGTPPYADSVKG RFTVSLDNAENTVYLLQMNSLKPEDTALYYCAA
QVQLVESGGGSVQAGGSLRLSCATS GDTYNSVYMG WFRQAPGKEREVA AISSGGDR TTYADSVKG RFTISQDNAKNTVYLLQMNSLKPEDTAMYYCAA
1 11 22 37 44 47 a

```

```

<-----CDR3-----> <framework4> Dromedary VHH-germline JH-gene #mut
DSTIYASYECGHGLSTGGYGYDS WGQGTQVTVSS - cAb-Lys3 D-0 Cvhhp-11 JH-03 18
DTSTWYRGYCGTNPNYFSY WGQGTQVTVSS - cAb-Lys2 D-0 Cvhhp-08 JH-05 25
GWSSLGSCGTNRNRNY WGQGTQVTVSS - D2-L19 D-2 Cvhhp-11 JH-03 30
GYRNYGQCATRY WGQGTQVTVSS - D2-L29 D-2 Cvhhp-11 JH-03 19
TRKYVPVRFALDQSSYDY WGQGTQVTVSS - D3-L11 D-3 Cvhhp-08 JH-05 39
GSGRAPPWWSILRSNSYNS WGQGTQVTVSS - D2-L31 D-2 Cvhhp-08 JH-03 36
ARQ GWYIPLNSYGYNY WAQGTQVTVSS - D2-L24 D-2 Cvhhp-08 JH-03 26
VWPGGWHAFLNGYGYNY WGQGTQVTVSS - D2-L27 D-2 Cvhhp-08 JH-03 17

```
