# Supplementary material
Source: PubMed Central journal article supplement (PMC1450215)
Supplement: pnas_0505379103_4.pdf [file pnas_0505379103_4.pdf]

| <b>Table 1.</b> Results of pair-wise binding of the anti-HEWL VHHs and binding to HEWL in competition with NAG <sub>3</sub> and Biebrich Scarlet (BS).* |           |        |         |           |        |        |           |        |
|---------------------------------------------------------------------------------------------------------------------------------------------------------|-----------|--------|---------|-----------|--------|--------|-----------|--------|
|                                                                                                                                                         | Group 1   |        |         |           |        |        | Group 2   |        |
|                                                                                                                                                         | Epitope 1 |        |         | Epitope 2 |        |        | Epitope 3 |        |
|                                                                                                                                                         | D2-L19    | D2-L29 | cAbLys2 | cAbLys3   | D3-L11 | D2-L31 | D2-L24    | D2-L27 |
| Pair-wise binding (%).                                                                                                                                  |           |        |         |           |        |        |           |        |
| D2-L19                                                                                                                                                  | -         | 7      | 7       | 8         | 12     | 11     | 99        | 100    |
| D2-L29                                                                                                                                                  | 6         | -      | 9       | 11        | 16     | 0      | 72        | 100    |
| cAbLys2                                                                                                                                                 | 10        | 10     | -       | 11        | 17     | 13     | 99        | 100    |
| cAbLys3                                                                                                                                                 | 11        | 11     | 6       | -         | 7      | 5      | 100       | 100    |
| D3-L11                                                                                                                                                  | 17        | 18     | 21      | 17        | -      | 9      | 100       | 99     |
| D2-L31                                                                                                                                                  | 20        | 16     | 18      | 13        | 13     | -      | 100       | 100    |
| D2-L24 <sup>†</sup>                                                                                                                                     | 70        | 75     | 91      | 82        | 78     | 74     | -         | 5      |
| D2-L27 <sup>†</sup>                                                                                                                                     | 86        | 59     | 55      | 71        | 62     | 47     | 0         | -      |
| Binding to HEWL in competition with NAG <sub>3</sub> and Biebrich Scarlet (B.S.) (%).                                                                   |           |        |         |           |        |        |           |        |
| NAG <sub>3</sub> <sup>†</sup>                                                                                                                           | 95        | 100    | 100     | 13        | 16     | 0      | 99        | 93     |
| B.S. <sup>†</sup>                                                                                                                                       | 8         | 10     | 60      | 71        | 3      | 55     | 36        | 93     |

\* The rows represent the first binder, NAG<sub>3</sub> or B.S. and the columns represent the second binder. Cells are shaded according to residual binding of the second binder (5% bins) as determined by surface plasmon resonance on a BIACORE 3000™ instrument. † The values in these rows were obtained by surface plasmon resonance using an IAsys™ instrument. HEWL, hen egg white lysozyme; VHH, variable domain of a heavy chain antibody.
