# Supplementary material
Source: PubMed Central journal article supplement (PMC1450215)
Supplement: pnas_0505379103_5.pdf [file pnas_0505379103_5.pdf]

**Table 2.** Data collection and refinement statistics.

|                                   | <b>cAb-lys3*</b> | <b>D2-L19†</b>                                | <b>cAb-Lys2†</b>                              | <b>D3-L11</b>   | <b>D2-L29</b>                    | <b>D2-L24</b>    |
|-----------------------------------|------------------|-----------------------------------------------|-----------------------------------------------|-----------------|----------------------------------|------------------|
| <b>Space group</b>                | C 2              | P2 <sub>1</sub> 2 <sub>1</sub> 2 <sub>1</sub> | P2 <sub>1</sub> 2 <sub>1</sub> 2 <sub>1</sub> | P2 <sub>1</sub> | P4 <sub>3</sub> 2 <sub>1</sub> 2 | I4               |
| a/b/c, Å                          | 128.2/72.8/38.7  | 51.5/53.4/104.5                               | 50.0/68.4/72.1                                | 43.9/49.9/57.0  | 114.1/114.1/35.7                 | 114.8/114.8/33.3 |
| $\alpha/\beta/\gamma$ , °         | 90/106.94/90     | 90/90/90                                      | 90/90/90                                      | 90/92.1/90      | 90/90/90                         | 90/90/90         |
| <b>Data statistics</b>            |                  |                                               |                                               |                 |                                  |                  |
| Resolution, Å                     | 100.0-2.1        | 30.0-1.85                                     | 27.0-1.4                                      | 17.0-1.6        | 81.7-2.0                         | 17.0-1.5         |
| R merge                           | 0.15             | 0.077                                         | 0.065                                         | 0.087           | 0.056                            | 0.061            |
| Completeness, %                   | 99.8             | 98.4                                          | 99.0                                          | 99.5            | 99.8                             | 99.9             |
| I/ $\sigma$                       | 11.5             | 23.2                                          | 22.9                                          | 11.0            | 26.2                             | 10.5             |
| Highest resolution shell, Å       | 2.18-2.1         | 1.92-1.85                                     | 1.45-1.40                                     | 1.66-1.60       | 2.07-2.0                         | 1.55-1.50        |
| R factor                          | 0.432            | 0.251                                         | 0.371                                         | 0.354           | 0.425                            | 0.353            |
| Completeness, %                   | 99.8             | 91.4                                          | 96.8                                          | 98.8            | 100.0                            | 99.5             |
| I/ $\sigma$                       | 3.48             | 7.15                                          | 3.35                                          | 2.5             | 4.5                              | 3.0              |
| <b>Refinement statistics</b>      |                  |                                               |                                               |                 |                                  |                  |
| Number of reflections             | 19935            | 24895                                         | 48908                                         | 29781           | 16470                            | 35086            |
| Number of reflections in free set | 1810             | 1254                                          | 2475                                          | 1536            | 830                              | 1762             |
| R                                 | 0.18             | 0.17                                          | 0.22                                          | 0.20            | 0.22                             | 0.21             |
| R <sub>free</sub>                 | 0.20             | 0.20                                          | 0.24                                          | 0.23            | 0.24                             | 0.23             |
| <b>Ramachandran Plot</b>          |                  |                                               |                                               |                 |                                  |                  |
| Most favored regions, %           | 88.6             | 92.2                                          | 89.2                                          | 89.6            | 84.4                             | 90.1             |
| Additionally allowed, %           | 10.9             | 7.8                                           | 10.8                                          | 10.0            | 14.6                             | 9.9              |
| Generously allowed regions, %     | 0.5              | 0                                             | 0                                             | 0.5             | 0                                | 0                |
| Disallowed regions, %             | 0                | 0                                             | 0                                             | 0               | 0                                | 0                |
| <b>RMS deviations</b>             |                  |                                               |                                               |                 |                                  |                  |
| Rms deviation bond lengths, Å     | 0.017            | 0.0075                                        | 0.0044                                        | 0.0092          | 0.0059                           | 0.0096           |
| Rms deviation bond angles, °      | 1.760            | 1.414                                         | 1.296                                         | 1.683           | 1.360                            | 1.604            |

\* Decanniere K., Transue T.R., Desmyter A., Maes D., Muyldermans S. & Wyns L. (2001) *J. Mol. Biol.* **313**, 473-478. (PDB ID code: 1JTT)

† De Genst, E., Silence, K., Ghahroudi, M. A., Decanniere, K., Loris, R., Kinne, J., Wyns, L. & Muyldermans, S. (2005) *J. Biol. Chem.* **280**, 14114-14121. (PDB ID codes: 1RJJC and 1RI8)
