# Supplementary material
Source: PubMed Central journal article supplement (PMC1450215)
Supplement: pnas_0505379103_6.pdf [file pnas_0505379103_6.pdf]

**Table 3.** Change in solvent accessible surface area of HEWL and VHH residues upon VHH-HEWL complex formation ( $> 1\text{\AA}^2 \Delta\text{ASA}$ ).

| HEWL    |                                          |         |                                          |          |                                          |         |                                          |          |                                          |         |                                          |
|---------|------------------------------------------|---------|------------------------------------------|----------|------------------------------------------|---------|------------------------------------------|----------|------------------------------------------|---------|------------------------------------------|
| D2-L29  |                                          | D2-L19  |                                          | cAb-Lys2 |                                          | D3-L11  |                                          | cAb-Lys3 |                                          | D2-L24  |                                          |
| Residue | $\Delta\text{ASA}$<br>( $\text{\AA}^2$ ) | Residue | $\Delta\text{ASA}$<br>( $\text{\AA}^2$ ) | Residue  | $\Delta\text{ASA}$<br>( $\text{\AA}^2$ ) | Residue | $\Delta\text{ASA}$<br>( $\text{\AA}^2$ ) | Residue  | $\Delta\text{ASA}$<br>( $\text{\AA}^2$ ) | Residue | $\Delta\text{ASA}$<br>( $\text{\AA}^2$ ) |
|         |                                          | LYS 33  | 4.03                                     |          |                                          |         |                                          | GLU 35   | 10.93                                    | LYS 1   | 13.05                                    |
| PHE 34  | 25.01                                    | PHE 34  | 41.05                                    | PHE 34   | 29.69                                    | ASN 46  | 12.4                                     | ASN 46   | 29.34                                    | GLN 41  | 44.62                                    |
| GLU 35  | 25.25                                    | GLU 35  | 18.25                                    | GLU 35   | 27.57                                    |         |                                          | THR 47   | 51.63                                    | THR 43  | 23.55                                    |
|         |                                          | ASN 37  | 40.61                                    |          |                                          | ASP 48  | 16.59                                    | ASP 48   | 54.28                                    | TYR 53  | 15.95                                    |
| THR 43  | 1.55                                     |         |                                          |          |                                          |         |                                          | SER 50   | 1.12                                     | ASN 65  | 27.08                                    |
| ASN 44  | 63.02                                    | ASN 44  | 54.3                                     | ASN 44   | 23.27                                    |         |                                          | ASP 52   | 20.82                                    | ASP 66  | 37.43                                    |
| ARG 45  | 110.14                                   | ARG 45  | 105.39                                   | ARG 45   | 116.62                                   |         |                                          | GLN 57   | 12.68                                    | GLY 67  | 43.42                                    |
| ASN 46  | 44.31                                    | ASN 46  | 40.88                                    | ASN 46   | 49.35                                    |         |                                          | ILE 58   | 3.38                                     | ARG 68  | 45.81                                    |
| THR 47  | 143.68                                   | THR 47  | 146.45                                   | THR 47   | 142.13                                   | ASN 59  | 5.49                                     | ASN 59   | 33.42                                    | ASN 74  | 7.84                                     |
| ASP 48  | 28.5                                     | ASP 48  | 43.15                                    | ASP 48   | 30.31                                    | ARG 61  | 65.56                                    | ARG 61   | 35.91                                    | ASN 77  | 11.58                                    |
|         |                                          |         |                                          | SER 50   | 2.7                                      | TRP 62  | 102.01                                   | TRP 62   | 119.47                                   | ILE 78  | 2.3                                      |
| ASP 52  | 18.14                                    | ASP 52  | 13.15                                    | ASP 52   | 19.76                                    | TRP 63  | 22.3                                     | TRP 63   | 37.56                                    | PRO 79  | 58.44                                    |
| GLN 57  | 6.93                                     | GLN 57  | 1.45                                     | GLN 57   | 2.9                                      | ARG 73  | 19.55                                    | ARG 73   | 30.98                                    | SER 81  | 79.27                                    |
|         |                                          |         |                                          | ASN 59   | 20.72                                    | LEU 75  | 60.27                                    | LEU 75   | 20.71                                    | ALA 82  | 11.26                                    |
|         |                                          |         |                                          | ARG 61   | 13.08                                    | LYS 97  | 11.07                                    | LYS 97   | 1.5                                      | LEU 84  | 46.06                                    |
|         |                                          |         |                                          | TRP 62   | 2.79                                     |         |                                          | ILE 98   | 6.14                                     | SER 85  | 26.74                                    |
| ARG 68  | 2.97                                     |         |                                          |          |                                          | ASP101  | 70.93                                    |          |                                          | SER 86  | 31.86                                    |
|         |                                          |         |                                          | ASN103   | 2.02                                     | GLY102  | 18.66                                    |          |                                          |         |                                          |
|         |                                          |         |                                          | ASN106   | 21.87                                    | ASN103  | 103.68                                   | ASN103   | 43.95                                    |         |                                          |
| VAL109  | 77.2                                     | VAL109  | 70.43                                    | VAL109   | 69.61                                    | ASN106  | 37.42                                    | ASN106   | 14.17                                    |         |                                          |
| ALA110  | 21.23                                    | ALA110  | 26.22                                    | ALA110   | 18.88                                    | ALA107  | 43.48                                    | ALA107   | 52.2                                     |         |                                          |
| ARG112  | 45.66                                    |         |                                          | ARG112   | 91.14                                    |         |                                          | TRP108   | 13.98                                    |         |                                          |
| ASN113  | 78.18                                    | ASN113  | 58.79                                    | ASN113   | 53.21                                    | VAL109  | 19.59                                    | VAL109   | 42.11                                    |         |                                          |
| ARG114  | 67.55                                    | ARG114  | 76.22                                    | ARG114   | 45.12                                    | ARG112  | 82.39                                    | ARG112   | 53.01                                    |         |                                          |
|         |                                          |         |                                          | LYS116   | 11.85                                    | ASN113  | 21.48                                    |          |                                          |         |                                          |
|         |                                          |         |                                          |          |                                          | LYS 116 | 14.85                                    |          |                                          |         |                                          |

## VHH

| D2-L29  |                                  | D2-L19  |                                  | cAb-Lys2 |                                  | D3-L11  |                                  | cAb-Lys3 |                                  | D2-L24  |                                  |
|---------|----------------------------------|---------|----------------------------------|----------|----------------------------------|---------|----------------------------------|----------|----------------------------------|---------|----------------------------------|
| Residue | $\Delta$ ASA<br>( $\text{Å}^2$ ) | Residue | $\Delta$ ASA<br>( $\text{Å}^2$ ) | Residue  | $\Delta$ ASA<br>( $\text{Å}^2$ ) | Residue | $\Delta$ ASA<br>( $\text{Å}^2$ ) | Residue  | $\Delta$ ASA<br>( $\text{Å}^2$ ) | Residue | $\Delta$ ASA<br>( $\text{Å}^2$ ) |
| TYR 29  | 26.21                            | GLU 44  | 2.6                              | ARG 45   | 17.4                             | ASP 29  | 28.85                            | THR 28   | 8.97                             | ASP 1   | 16.39                            |
| LYS 30  | 27.25                            | VAL 50  | 1.25                             | VAL 50   | 1.51                             | SER 30  | 9.37                             | ILE 29   | 58.18                            | TYR 27  | 61.84                            |
| ASN 31  | 20.06                            | ASP 52  | 4.95                             | ASP 52   | 4.09                             | GLU 32  | 33.69                            | GLY 30   | 12.38                            | SER 30  | 10.55                            |
| PHE 37  | 34.81                            | ARG 56  | 43.26                            | ASN 57   | 33.17                            | TYR 52  | 30.02                            | PRO 31   | 2.69                             | ARG 100 | 80.08                            |
| ASP 44  | 17.05                            | THR 57  | 11.37                            | THR 58   | 10.16                            | HIS 54  | 53.26                            | TYR 32   | 33.1                             | GLN 101 | 80.99                            |
| ARG 45  | 30.58                            | ALA 58  | 31.71                            | ALA 59   | 32.96                            | THR 55  | 31.2                             | MET 53   | 3.3                              | GLY 102 | 57.6                             |
| GLY 47  | 8.88                             | TYR 59  | 18.35                            | TYR 60   | 13.45                            | ASN 57  | 21.24                            | GLY 54   | 47.3                             | TRP 103 | 42.08                            |
| PHE 50  | 2.38                             | ALA 60  | 2.4                              | ASP 62   | 25.51                            | TYR 59  | 6.74                             | GLY 55   | 37.48                            | TYR 104 | 82.55                            |
| TYR 60  | 19.59                            | ASP 61  | 31.69                            | LYS 65   | 16.96                            | ARG 100 | 4.47                             | ILE 57   | 46.2                             | ILE 105 | 25.4                             |
| TYR 100 | 89.55                            | TRP 99  | 72.31                            | ASP 99   | 6.42                             | LYS 101 | 33.23                            | ASN 74   | 6.81                             | TYR 110 | 98.19                            |
| ARG 101 | 13.15                            | SER 101 | 22.58                            | THR 100  | 12.19                            | TYR 102 | 109.78                           | SER 100  | 1.27                             | GLY 111 | 11.08                            |
| ASN 102 | 34.07                            | SER 104 | 39.92                            | TRP 103  | 95.04                            | VAL 103 | 10.43                            | THR 101  | 33.3                             | ASN 113 | 24.99                            |
| TYR 103 | 19.76                            | CYS 105 | 18.24                            | ARG 105  | 35.4                             | PRO 104 | 65.55                            | ILE 102  | 76.17                            |         |                                  |
| GLN 105 | 44.79                            | GLY 106 | 19.38                            | GLY 106  | 4.1                              | VAL 105 | 31.36                            | TYR 103  | 51.55                            |         |                                  |
| CYS 106 | 18.22                            | THR 107 | 44.96                            | TYR 107  | 123.74                           | ARG 106 | 49.35                            | ALA 104  | 115.87                           |         |                                  |
| ALA 107 | 22.76                            | ASN 108 | 58.41                            | CYS 108  | 24.3                             | PHE 107 | 56.78                            | SER 105  | 72.31                            |         |                                  |
| THR 108 | 24.78                            | ARG 109 | 32.78                            | GLY 109  | 15.63                            | SER 112 | 16.57                            | TYR 106  | 102.05                           |         |                                  |
| ARG 109 | 129.83                           | ASN 110 | 83.81                            | THR 110  | 20.39                            | SER 113 | 21.07                            | TYR 107  | 24.15                            |         |                                  |
| TYR 110 | 18.18                            | ARG 111 | 84.22                            | ASN 111  | 41.09                            | ASP 115 | 34.31                            | GLU 108  | 7.19                             |         |                                  |
| TRP 111 | 31.34                            | TYR 112 | 6.52                             | ASN 113  | 102.8                            |         |                                  | TYR 118  | 51.76                            |         |                                  |
|         |                                  | ASN 113 | 9.71                             | TYR 114  | 98.42                            |         |                                  |          |                                  |         |                                  |
|         |                                  |         |                                  | PHE 115  | 1.42                             |         |                                  |          |                                  |         |                                  |
|         |                                  |         |                                  | SER 116  | 33.43                            |         |                                  |          |                                  |         |                                  |
