# Supplementary material
Source: PubMed Central journal article supplement (PMC1450215)
Supplement: pnas_0505379103_9.pdf [file pnas_0505379103_9.pdf]

**Table 6.** Number of atom contacts mediated by main-chain or side-chain atoms in the association of HEWL with HEWL-specific VHHs and conventional antibodies.

|                        | Conventional anti-HEWL antibodies* |            |            |            |            |            | Anti-HEWL VHHs |             |             |            |            |            |
|------------------------|------------------------------------|------------|------------|------------|------------|------------|----------------|-------------|-------------|------------|------------|------------|
|                        | D11.15                             | D1.3       | D44.1      | F9.13.7    | HyHEL<br>5 | HyHEL<br>8 | D2L19          | cAb<br>Lys2 | cAb<br>Lys3 | D3L11      | D2L29      | D2L24      |
| MC-<br>MC <sup>†</sup> | 11                                 | 9          | 15         | 10         | 11         | 8          | 9              | 6           | 14          | 0          | 2          | 21         |
| MC-<br>SC <sup>†</sup> | 5                                  | 19         | 11         | 22         | 19         | 14         | 36             | 26          | 56          | 18         | 25         | 26         |
| SC-<br>MC <sup>†</sup> | 21                                 | 58         | 13         | 20         | 34         | 46         | 31             | 16          | 11          | 8          | 21         | 56         |
| SC-<br>SC <sup>†</sup> | 50                                 | 143        | 70         | 80         | 69         | 104        | 54             | 79          | 66          | 97         | 71         | 58         |
| <b>Total</b>           | <b>87</b>                          | <b>229</b> | <b>109</b> | <b>132</b> | <b>133</b> | <b>172</b> | <b>130</b>     | <b>127</b>  | <b>147</b>  | <b>123</b> | <b>119</b> | <b>161</b> |

\* These structures are: F9.13.7::GEL (PDB ID code 1FBI), D11.15::JEL (PDB ID code 1JHL), D1.3::HEWL (PDB ID code 1VFB), D44.1::HEWL (PDB ID code 1MLC), HyHEL-5::HEWL (PDB ID code 3HFL) and HyHEL-8::HEWL (PDB ID code 1NDG). PDB, Protein Data Bank. <sup>†</sup> The contacts (within 4 Å distance) between main chain atoms of antibody and main chain atoms of HEWL (MC-MC), main chain atoms of antibody and side chain atoms of HEWL (SC-MC), side chain atoms of antibody and main chain atoms of HEWL (MC-SC) and side chain atoms of antibody and side chain atoms of HEWL (SC-SC). The numbers represent the number of contacts as assessed by the program CONTACT from the CCP4 suite.
