# Supplementary material
Source: PubMed Central journal article supplement (PMC1450215)
Supplement: pnas_0505379103_10.pdf [file pnas_0505379103_10.pdf]

**Table 5. Chemical and geometrical properties of the paratopes and epitopes of the Fv-lysozyme complexes**

|                                          | <b>HyHEL-8-HEWL</b> |      | <b>HyHEL-5-HEWL</b> |      | <b>D11.15-PEL</b> |      | <b>D1.3-HEWL</b> |      | <b>F9.13.7-GEL</b> |      | <b>D44.1-HEWL</b> |      |
|------------------------------------------|---------------------|------|---------------------|------|-------------------|------|------------------|------|--------------------|------|-------------------|------|
| Interface<br>$\Delta$ ASA*               | 895                 | 944  | 865                 | 849  | 605               | 640  | 674              | 709  | 858                | 836  | 669               | 723  |
| Planarity*                               | 2.28                | 2.18 | 2.70                | 2.63 | 1.71              | 1.83 | 1.59             | 1.69 | 2.09               | 1.90 | 1.71              | 1.98 |
| fraction of<br>$\Delta$ ASA<br>polar, %* | 47.6                | 53.3 | 48.4                | 54.2 | 49.4              | 51.3 | 51.3             | 56.0 | 48.6               | 49.5 | 43.4              | 42.9 |
| H-bonds <sup>†</sup>                     | 13                  |      | 11                  |      | 5                 |      | 12               |      | 12                 |      | 8                 |      |
| Bridging<br>water <sup>†</sup>           | 10                  |      | 2                   |      | -                 |      | 8                |      | -                  |      | 3                 |      |
| Ion-pairs*                               | 0                   |      | 1                   |      | 0                 |      | 0                |      | 1                  |      | 0                 |      |
| Sc <sup>‡</sup>                          | 0.73                |      | 0.72                |      | 0.65              |      | 0.73             |      | 0.65               |      | 0.66              |      |

\* Values calculated by the protein interaction server [Jones, S. & Thornton, J. M. (1996) *Proc. Natl. Acad. Sci. USA* **93**, 13-20].

<sup>†</sup> Values were obtained by the program HBPLUS [McDonald, I. K. & Thornton, J. M. (1994) *J. Mol. Biol.* **238**, 777-793].

<sup>‡</sup> Values were calculated by the program SC [Lawrence, M. C. & Colman, P. M. (1993) *J. Mol. Biol.* **234**, 946-950].
