# Supplementary material
Source: PubMed Central journal article supplement (PMC1450215)

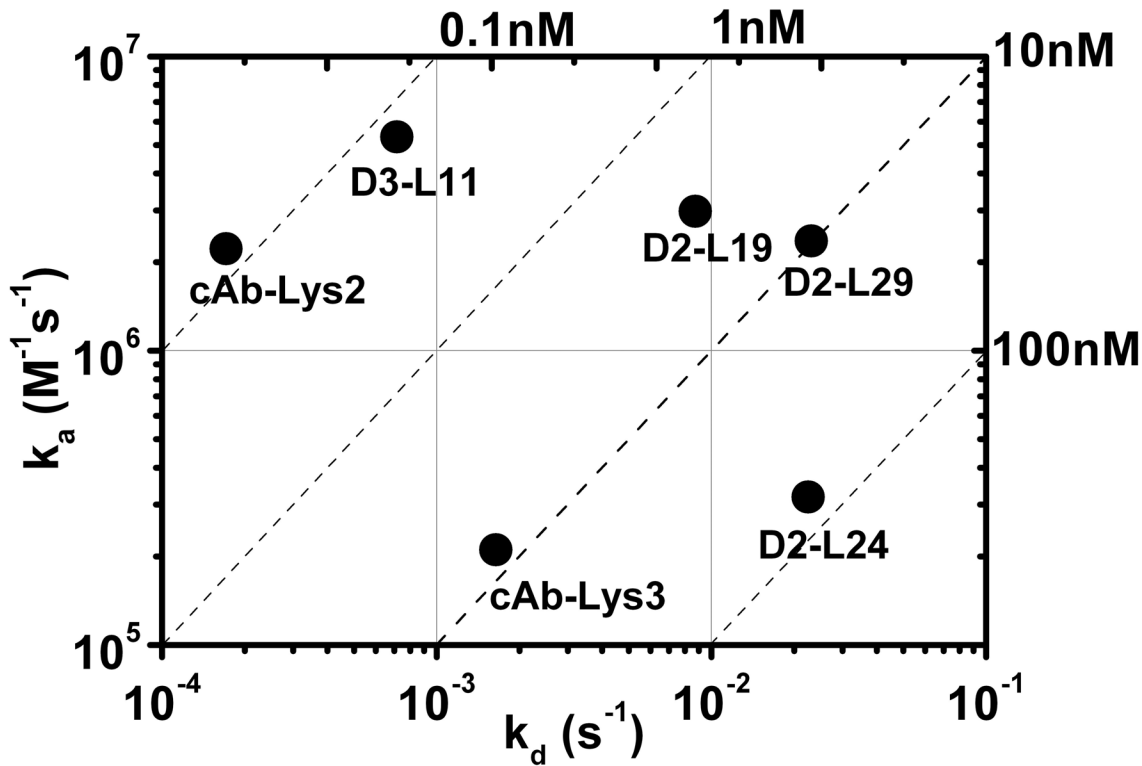

Supplement: pnas_0505379103_2.pdf [file pnas_0505379103_2.pdf]

**A**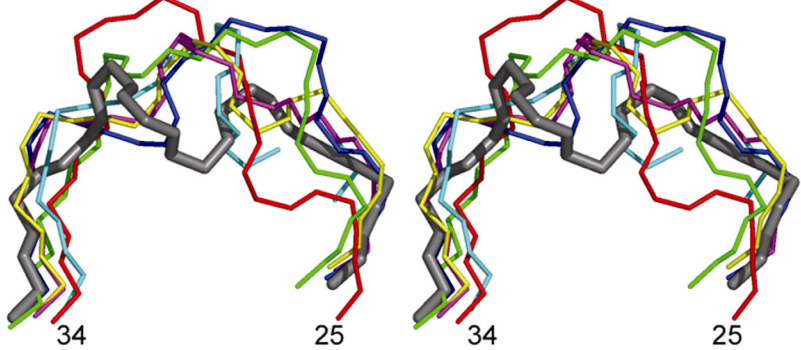**B**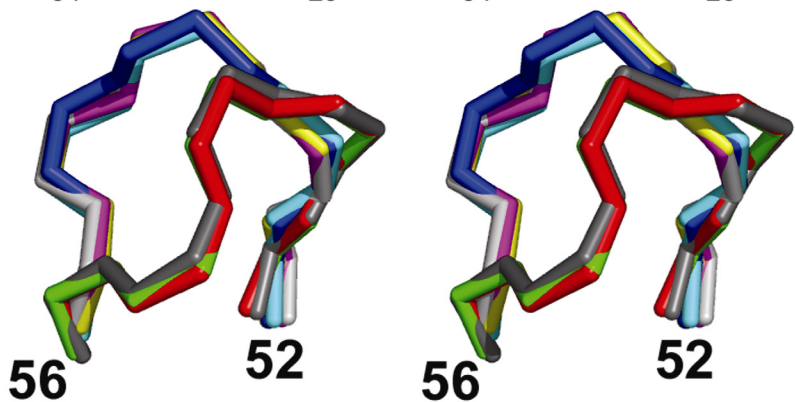**C**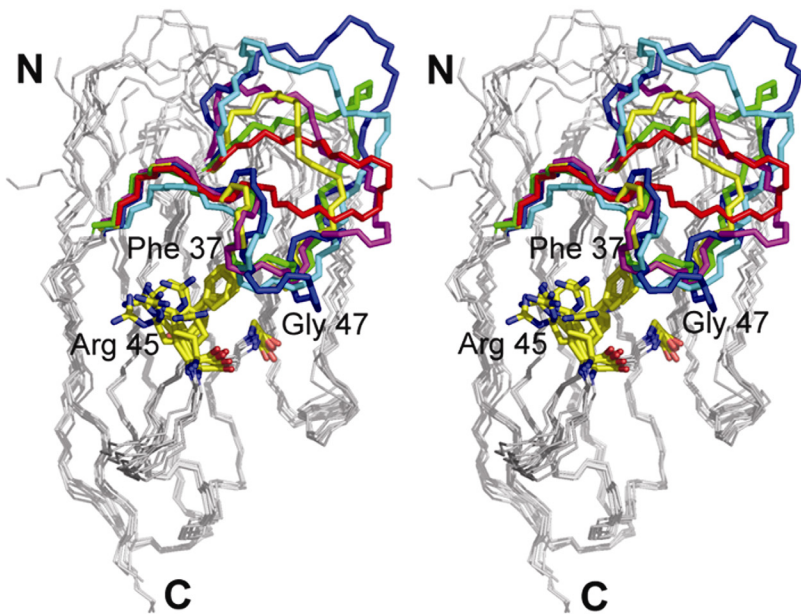

Supplement: pnas_0505379103_3.pdf [file pnas_0505379103_3.pdf]
